# Supplementary material for: Optimal Laboratory Cultivation Conditions of <i>Limnospira maxima</i> for Large-Scale Production
Source: Preprints.org preprint supplement (doi:10.20944/preprints202309.1760.v1), 2023-09-28
Supplement: Supplementary file 1 [file supplementary]

## Sheet: Planilha1
ALL DATASET
Optical density		0											1		1		Optical density
Dry weight		0.798	0										0.75				Dry weight		0.798
Chlorophyll "a"		0.669	0.92	0									0.5				Chlorophyll "a"		0.669	0.92
Chlorophyll "b"		0.878	0.811	0.713	0								0.25				Chlorophyll "b"		0.878	0.811	0.713
Total carotenoids		-0.252	0.587	0.524	0.447	0							0		0		Total carotenoids		-0.252	0.587	0.524	0.447
Phycocyanin		-0.825	0.78	0.709	0.786	0.637	0						-0.25				Phycocyanin		-0.825	0.78	0.709	0.786	0.637				1.25e-06
Allophycocyanin		-0.709	0.711	0.657	0.675	0.614	0.843	0					-0.5				Allophycocyanin		-0.709	0.711	0.657	0.675	0.614	0.843
Phycoerythrin		-0.654	0.725	0.65	0.691	0.651	0.86	0.937	0				-0.75				Phycoerythrin		-0.654	0.725	0.65	0.691	0.651	0.86	0.937
Soluble proteins		0.752	0.882	0.809	0.776	0.518	0.657	0.646	0.693	0			-1		-1		Soluble proteins		0.752	0.882	0.809	0.776	0.518	0.657	0.646	0.693
		Optical density	Dry weight	Chlorophyll "a"	Chlorophyll "b"	Total carotenoids	Phycocyanin	Allophycocyanin	Phycoerythrin	Soluble proteins									Optical density	Dry weight	Chlorophyll "a"	Chlorophyll "b"	Total carotenoids	Phycocyanin	Allophycocyanin	Phycoerythrin	Soluble proteins
DATA FOR 3 DAYS
Optical density		0											1		1		Optical density										1.28e-08
Dry weight		0.166	0										0.75				Dry weight		0.166
Chlorophyll "a"		0.168	0.881	0									0.5				Chlorophyll "a"		0.168	0.881
Chlorophyll "b"		0.633	0.406	0.389	0								0.25				Chlorophyll "b"		0.633	0.406	0.389
Total carotenoids		-0.267	0.509	0.42	0.0223	0							0		0		Total carotenoids		-0.267	0.509	0.42	0.0223
Phycocyanin		-0.297	0.156	0.279	-0.0902	0.721	0						-0.25				Phycocyanin		-0.297	0.156	0.279	-0.0902	0.721
Allophycocyanin		-0.633	0.244	0.28	-0.116	0.663	0.641	0					-0.5				Allophycocyanin		-0.633	0.244	0.28	-0.116	0.663	0.641
Phycoerythrin		-0.539	0.295	0.285	-0.123	0.668	0.64	0.843	0				-0.75				Phycoerythrin		-0.539	0.295	0.285	-0.123	0.668	0.64	0.843
Soluble proteins		0.939	0.781	0.656	0.373	0.333	-0.096	0.083	0.199	0			-1		-1		Soluble proteins		0.939	0.781	0.656	0.373	0.333	-0.096	0.083	0.199
		Optical density	Dry weight	Chlorophyll "a"	Chlorophyll "b"	Total carotenoids	Phycocyanin	Allophycocyanin	Phycoerythrin	Soluble proteins
DATA FOR 12 DAYS
Optical density		0											1		1		Optical density
Dry weight		0.423	0										0.75				Dry weight		0.423								2.56e-05
Chlorophyll "a"		0.312	0.878	0									0.5				Chlorophyll "a"		0.312	0.878
Chlorophyll "b"		0.795	0.0918	0.023	0								0.25				Chlorophyll "b"		0.795	0.0918	0.023
Total carotenoids		-0.261	0.371	0.316	-0.258	0							0		0		Total carotenoids		-0.261	0.371	0.316	-0.258
Phycocyanin		0.252	0.149	0.22	0.282	0.279	0						-0.25				Phycocyanin		0.252	0.149	0.22	0.282	0.279
Allophycocyanin		-0.321	0.175	0.196	-0.121	0.362	0.245	0					-0.5				Allophycocyanin		-0.321	0.175	0.196	-0.121	0.362	0.245
Phycoerythrin		-0.186	0.199	0.153	-0.106	0.417	0.216	0.769	0				-0.75				Phycoerythrin		-0.186	0.199	0.153	-0.106	0.417	0.216	0.769
Soluble proteins		0.515	0.8	0.652	0.197	0.279	-0.0511	0.104	0.247	0			-1		-1		Soluble proteins		0.515	0.8	0.652	0.197	0.279	-0.0511	0.104	0.247
		Optical density	Dry weight	Chlorophyll "a"	Chlorophyll "b"	Total carotenoids	Phycocyanin	Allophycocyanin	Phycoerythrin	Soluble proteins
DATA FOR 27 DAYS
Optical density		0											1		1		Optical density
Dry weight		0.615	0										0.75				Dry weight		0.615
Chlorophyll "a"		0.271	0.708	0									0.5				Chlorophyll "a"		0.271	0.708
Chlorophyll "b"		0.76	0.619	0.358	0								0.25				Chlorophyll "b"		0.76	0.619	0.358						0.000175
Total carotenoids		-0.185	-0.0786	-0.123	0.0137	0							0		0		Total carotenoids		-0.185	-0.0786	-0.123	0.0137
Phycocyanin		0.663	0.301	0.178	0.611	0.192	0						-0.25				Phycocyanin		0.663	0.301	0.178	0.611	0.192
Allophycocyanin		0.0276	-0.221	-0.15	0.231	0.00252	0.389	0					-0.5				Allophycocyanin		0.0276	-0.221	-0.15	0.231	0.00252	0.389
Phycoerythrin		0.182	-0.12	-0.137	0.316	0.15	0.517	0.733	0				-0.75				Phycoerythrin		0.182	-0.12	-0.137	0.316	0.15	0.517	0.733
Soluble proteins		0.466	0.608	0.47	0.557	-0.0568	0.107	-0.0591	0.0998	0			-1		-1		Soluble proteins		0.466	0.608	0.47	0.557	-0.0568	0.107	-0.0591	0.0998
		Optical density	Dry weight	Chlorophyll "a"	Chlorophyll "b"	Total carotenoids	Phycocyanin	Allophycocyanin	Phycoerythrin	Soluble proteins
