# Supplementary material for: Optimal Laboratory Cultivation Conditions of <i>Limnospira maxima</i> for Large-Scale Production
Source: Preprints.org preprint supplement (doi:10.20944/preprints202309.1760.v1), 2023-09-28
Supplement: Supplementary file 6 [file Supplementary Table S4.docx]

**Supplementary Table S4.** Effect of light spectra and nitrogen source on chlorophyll “b” concentration of *Limnospira maxima* grown in white, red, blue, and yellow light spectra, supplemented with NaNO3, KNO3, plus control (WN). Values followed by capital letter denote significative effect between N source in the same light spectra and small letter denote significance between light spectra in the same nitrogen source. All value represents media (± SD), followed by SNK statistical test.

| Light spectra | N source | 0 | 3 | 6 | 9 | 12 | 15 | 18 | 21 | 24 | 27 |
| --- | --- | --- | --- | --- | --- | --- | --- | --- | --- | --- | --- |
| White | NaNO3 | 17.68 Aa | 29.33 Aa | 36.34 Ba | 40.59 Ba | 51.86 Ba | 56.57 Ba | 65.99 Ba | 65.85 Aa | 80.37 Aa | 82.01 Aa |
| KNO3 | 9.85 Cc | 18.06 Ba | 24.39 Cd | 28.27 Cb | 34.01 Cc | 37.27 Cc | 43.19 Cb | 49.35 Bb | 50.57 Cb | 56.85 Bc |
| WN | 15.14 Ba | 31.72 Aa | 42.45 Aa | 49.7 A | 57.88 Aa | 59.78 Aa | 71.20 Aa | 66.71 Aa | 62.48 Ba | 58.07 Ba |
| Red | NaNO3 | 18.06 Aa | 22.74 Ab | 29.39 Ab | 33.35 Ab | 39.80 Ab | 39.04 Ab | 48.27 Ac | 56.48 Ab | 57.17 Ac | 60.80 Ac |
| KNO3 | 13.93 Ba | 20.36 Ba | 26.46 Ab | 31.89 Ab | 35.13 B | 40.61 Ab | 44.42 Ab | 49.84 Bb | 53.18 Ac | 59.65 Ab |
| WN | 11.00 Cb | 18.18 Bb | 24.61 Bc | 28.62 A | 31.25 Cc | 33.68 Bc | 37.20 Bc | 37.84 Cc | 42.44 Bb | 41.28 Bb |
| Blue | NaNO3 | 13.05 Ab | 14.24 Bc | 15.44 Bc | 16.55 Bc | 19.11 Bc | 16.93 Cc | 20.75 Bd | 21.84 Bd | 25.44 Bd | 25.83 Bd |
| KNO3 | 10.24 Bb | 13.05 Bb | 14.57 Bd | 16.39 Bc | 19.05 Bd | 19.85 Bd | 20.81 Bc | 23.59 Bc | 22.57 Bd | 25.83 Bd |
| WN | 15.23 Aa | 18.79 Ab | 22.50 Ac | 26.08 A | 28.26 Ad | 28.90 Ad | 32.45 Ad | 27.40 Ad | 34.76 Ac | 33.85 Ac |
| Yellow | NaNO3 | 15.16 Ab | 21.74 Ab | 31.45 Ab | 34.63 Ab | 40.60 Bb | 42.96 Bb | 52.45 Ab | 51.44 Bc | 63.94 Bb | 69.65 Bb |
| KNO3 | 12.67 Ba | 20.95 Aa | 30.16 Aa | 35.60 Aa | 45.01 Aa | 48.06 Aa | 52.08 Aa | 63.19 Aa | 70.09 Aa | 71.23 Aa |
| WN | 10.84 Bb | 20.89 Ab | 26.88 Bb | 31.60 A | 36.73 Cb | 40.53 Bb | 47.25 Bb | 45.17 Cb | 44.00 Cb | 42.44 Cb |
