# Supplementary material for: Optimal Laboratory Cultivation Conditions of <i>Limnospira maxima</i> for Large-Scale Production
Source: Preprints.org preprint supplement (doi:10.20944/preprints202309.1760.v1), 2023-09-28
Supplement: Supplementary file 9 [file Supplementary Table S7.docx]

**Supplementary Table S7.** Effect of light spectra and nitrogen source on allophycocyanin concentration of *Limnospira maxima* grown in white, red, blue, and yellow light spectra, supplemented with NaNO3, KNO3, plus control (WN). Values followed by capital letters denote significant effects between N sources in the same light spectra, and small letters denote significance between light spectra in the same nitrogen source. All values represent means (± SD), followed by SNK statistical test.

| Light spectra | N source | 0 | 3 | 6 | 9 | 12 | 15 | 18 | 21 | 24 | 27 |
| --- | --- | --- | --- | --- | --- | --- | --- | --- | --- | --- | --- |
| White | NaNO3 | 34.58 Ab | 57.31 Ab | 71.08 Ab | 79.40 Bb | 101.43 Bb | 110.64 Ab | 129.07 Ab | 128.80 Ab | 157.19 Ab | 160.40 Ab |
| KNO3 | 23.13 Bc | 42.38 Bb | 57.22 Bc | 66.32 Cb | 79.81 Cb | 87.45 Bc | 101.34 Bc | 115.80 Ab | 118.66 Bc | 133.39 Bc |
| WN | 28.73 Bc | 60.20 Ab | 80.55 Ab | 94.31 Ab | 109.84 Ab | 113.44 Ab | 135.12 Ab | 126.59 Ab | 118.57 Bc | 110.20 Cc |
| Red | NaNO3 | 61.24 Aa | 77.08 Aa | 99.63 Aa | 113.05 Aa | 134.93 Aa | 132.36 Aa | 163.66 Aa | 191.49 Aa | 193.83 Aa | 206.12 Aa |
| KNO3 | 33.60 Bb | 49.10 Cb | 63.81 Cb | 76.93 Ca | 84.73 Cb | 97.95 Bb | 107.15 Bab | 120.22 Bb | 128.27 Bb | 143.87 Bb |
| WN | 33.34 Bbc | 55.08 Bb | 74.59 Bb | 86.72 Bbc | 94.69 Bc | 102.08 Bc | 112.74 Bc | 114.68 Bc | 128.62 Bb | 125.11 Cb |
| Blue | NaNO3 | 64.59 Ba | 70.45 Ba | 76.40 Bb | 81.86 Bb | 94.56 Bc | 83.79 Cc | 102.67 Bc | 108.05 Bc | 125.89 Bd | 127.81 Bc |
| KNO3 | 50.69 Ca | 64.58 Ba | 72.09 Ba | 81.10 Ba | 94.25 Ba | 98.23 Bb | 102.96 Bb | 116.70 Bb | 111.67 Cc | 127.81 Bc |
| WN | 74.59 Aa | 92.00 Aa | 110.14 Aa | 127.67 Aa | 138.36 Aa | 141.48 Aa | 158.90 Aa | 134.16 Aa | 170.19 Aa | 165.75 Aa |
| Yellow | NaNO3 | 30.03 Ab | 43.04 Bc | 62.28 Ac | 68.58 Bc | 80.39 Bd | 85.06 Bc | 103.85 Cc | 101.85 Cd | 126.60 Bc | 137.91 Bc |
| KNO3 | 27.19 Ac | 44.96 Bb | 64.74 Aab | 76.40 Aa | 96.61 Aa | 103.15 Aa | 111.78 Ba | 135.62 Aa | 150.43 Aa | 152.88 Aa |
| WN | 28.76 Ac | 55.41 Ab | 71.32 Ab | 83.85 Ac | 97.45 Ac | 107.54 Ac | 125.37 Ab | 119.83 Bbc | 116.74 Bc | 112.61 Cc |
