# Supplementary material for: Optimal Laboratory Cultivation Conditions of <i>Limnospira maxima</i> for Large-Scale Production
Source: Preprints.org preprint supplement (doi:10.20944/preprints202309.1760.v1), 2023-09-28
Supplement: Supplementary file 11 [file Supplementary Table S9.docx]

**Supplementary Table S9.** Effect of light spectra and nitrogen source on soluble proteins concentration of *Limnospira maxima* grown in white, red, blue, and yellow light spectra, supplemented with NaNO3, KNO3, plus control (WN). Values followed by a capital letter denote a significant effect between N source in the same light spectra, and a small letter denotes significance between light spectra in the same nitrogen source. All values represent the mean (± SD), followed by the SNK statistical test.

| Light spectra | N source | 0 | 3 | 6 | 9 | 12 | 15 | 18 | 21 | 24 | 27 |
| --- | --- | --- | --- | --- | --- | --- | --- | --- | --- | --- | --- |
| White | NaNO3 | 26.45 Ab | 43.87 Ba | 54.36 Ba | 60.72 Ba | 77.57 Ba | 84.62 Ba | 98.71 Ba | 98.50 Ba | 120.22 Aa | 122.67 Aa |
| KNO3 | 17.47 Bb | 32.01 Cb | 43.22 Cb | 50.10 Cb | 60.28 Cb | 66.05 Cb | 76.54 Cb | 87.46 Cb | 89.62 Bb | 100.75 Cb |
| WN | 28.44 Ab | 59.58 Ab | 79.73 Ab | 93.35 Ab | 108.72 Ab | 112.29 Ab | 133.74 Ab | 125.30 Ab | 117.36 Ab | 109.07 Bb |
| Red | NaNO3 | 31.06 Ab | 39.09 Aa | 50.52 Aa | 57.33 Aa | 68.42 Ab | 67.12 Ab | 83.00 Ab | 97.11 Aa | 98.30 Ab | 104.53 Ab |
| KNO3 | 22.32 Ba | 32.62 Bb | 42.39 Bb | 51.11 Ab | 56.29 Bc | 65.08 Ab | 71.19 Bc | 79.87 Bc | 85.22 Bb | 95.58 Bb |
| WN | 21.30 Bc | 35.19 Bd | 47.65 Ac | 55.40 Ac | 60.49 Bc | 65.20 Ac | 72.02 Bc | 73.25 Bc | 82.16 Bc | 79.91 Cc |
| Blue | NaNO3 | 36.38 Aa | 39.68 Aa | 43.03 Bb | 46.11 Bb | 53.26 Bc | 47.19 Cc | 57.83 Bc | 60.86 Bc | 70.90 Ac | 71.99 Ac |
| KNO3 | 28.55 Ba | 36.37 Ab | 40.60 Bb | 45.68 Bc | 53.09 Bc | 55.32 Bc | 57.99 Bd | 65.73 Ad | 62.89 Cc | 72.03 Ac |
| WN | 33.92 Ab | 41.84 Ac | 50.09 Ac | 58.06 Ac | 62.93 Ac | 64.34 Ac | 72.26 Ac | 61.01 Bd | 77.40 Ad | 75.38 Ac |
| Yellow | NaNO3 | 23.52 Bb | 33.72 Cb | 48.79 Ca | 53.72 Cb | 62.97 Cb | 66.64 Cb | 81.35 Cb | 79.79 Cb | 99.17 Cb | 108.04 Cb |
| KNO3 | 25.30 Ba | 41.83 Ba | 60.23 Ba | 71.09 Ba | 89.89 Ba | 95.98 Ba | 104.01 Ba | 126.19 Ba | 139.97 Ba | 142.24 Ba |
| WN | 39.04 Aa | 75.22 Aa | 96.81 Aa | 113.82 Aa | 132.29 Aa | 145.98 Aa | 170.18 Aa | 162.67 Aa | 158.46 Aa | 152.86 Aa |
